# Supplementary material
Source: PubMed Central journal article supplement (PMC3175082)

## Supporting Material

### Extracellular Potassium Inhibits Kv7.1 Potassium Channels by Stabilizing an Inactivated State

Anders Peter Larsen, Annette Buur Steffensen, Morten Grunnet and Søren-Peter Olesen

#### Figure legends for supporting figures

**Supporting Figure S1. Response of voltage-gated potassium channels in the Kv7 family to changes in extracellular potassium.** (A) Representative current traces of Kv7.2, Kv7.2/7.3, Kv7.4 and Kv7.5 channels recorded in 1 (*black*) and 10 (*grey*) mM  $[K^+]_o$  as indicated. The voltage clamp protocol shown in the inset was used for all the recordings. (B) Comparison of the ratio ( $I_{10\text{ mM}}/I_{1\text{ mM}}$ ) of the current amplitude measured at 40 mV in 1 and 10 mM  $[K^+]_o$  to the theoretical ratio predicted by the GHK flux equation (*dashed line*). \* indicates statistically significant difference compared to the predicted ratio ( $p < 0.05$ ).

**Supporting Figure S2. Response of Kv7.1/KCNE2 and Kv7.1/KCNE3 channels to changes in extracellular potassium.** (A) Representative current traces of Kv7.1/KCNE2 and Kv7.1/KCNE3 channels recorded in 1 (*black*) and 10 (*grey*) mM  $[K^+]_o$  as indicated. (B) Comparison of the ratio ( $I_{10\text{ mM}}/I_{1\text{ mM}}$ ) of the current amplitude measured at 40 mV in 1 and 10 mM  $[K^+]_o$  to the theoretical ratio predicted by the GHK flux equation (*dashed line*). \* indicates statistically significant difference compared to the predicted ratio ( $p < 0.05$ ).

Figure S1

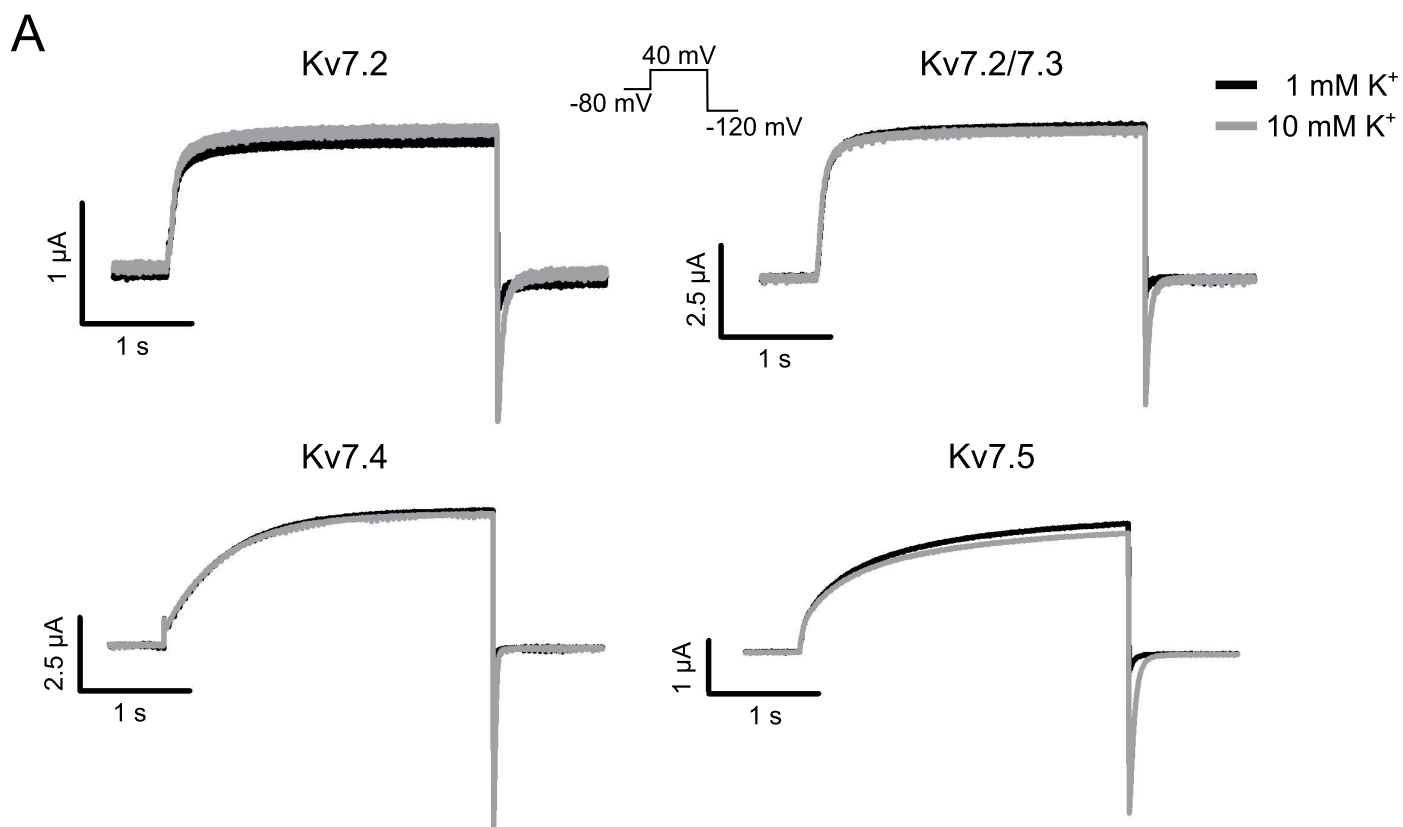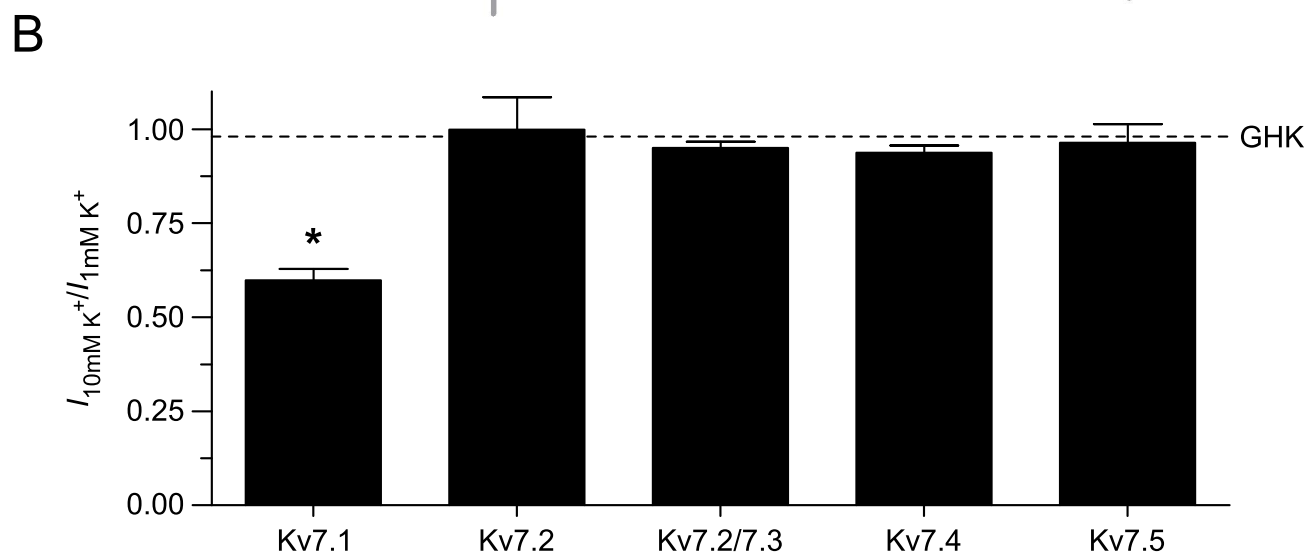

Figure S2

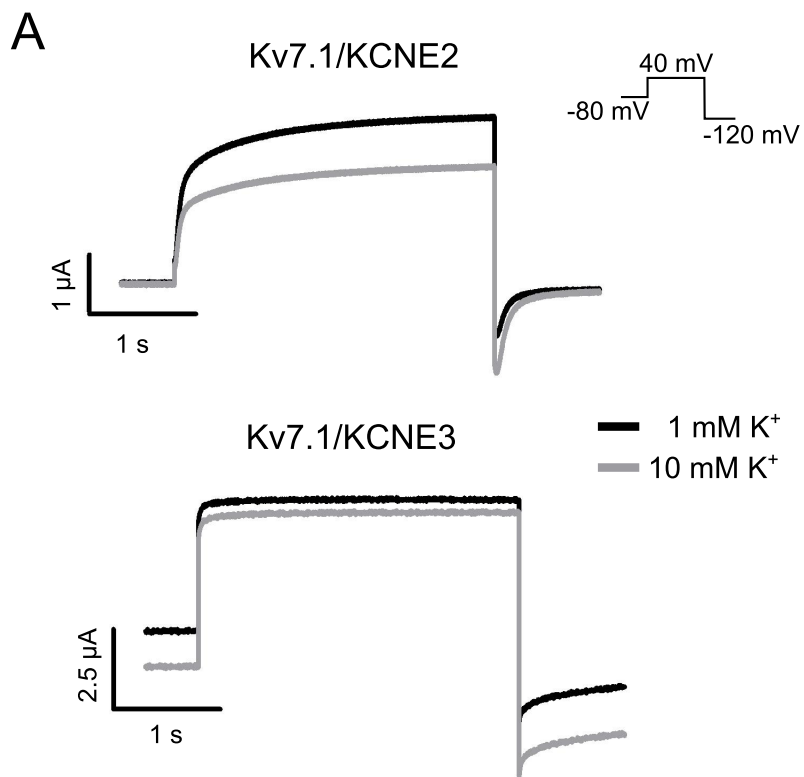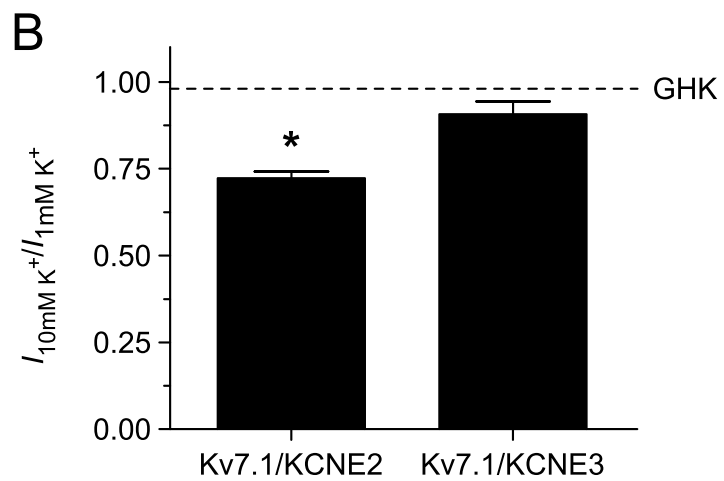

Supplement: mmc1.pdf [file mmc1.pdf]
